# Supplementary material for: Incident COVID-19 and Hospitalizations by Variant Era Among Vaccinated Solid Organ Transplant Recipients
Source: PubMed Central journal article supplement (PMC10439474; doi:10.1001/jamanetworkopen.2023.29736), 2023-08-18
Supplement: jamanetwopen-e2329736-s002.pdf [file jamanetwopen-e2329736-s002.pdf]

## Data Sharing Statement

Chiang. Incident COVID-19 and Hospitalizations by Variant Era Among Vaccinated Solid Organ Transplant Recipients. *JAMA Netw Open*. Published August 18, 2023.

doi:10.1001/jamanetworkopen.2023.29736

### Data Yes

**Data available:** Deidentified participant data. Requests for deidentified data may be sent to Dr. William Werbel (PI, [wwerbel1@jhmi.edu](mailto:wwerbel1@jhmi.edu)) and the Johns Hopkins Transplant Research Center ([TRCadministration@jh.edu](mailto:TRCadministration@jh.edu)) for review. Data requests will also require review by the Johns Hopkins Institutional Review Board for consideration of a data use agreement.
